# Supplementary material for: A study of female tennis players: Speedcourt training is effective on improving agility and change-of-direction
Source: PeerJ. 2025 Apr 28;13:e19339. doi: 10.7717/peerj.19339 (PMC12045285; doi:10.7717/peerj.19339)
Supplement: Supplemental Information 1 [file peerj-13-19339-s001.xlsx]

## Sheet: Sheet1
Group (1=FS,2=RS)	id	Hieght（cm）	weight（kg）	Age（years）	ITN score	ITN grade	Training years	Pre-spider run test（s）	Post-spider run test（s）	Pre-T-drill test（s）	Post-T-drill test（s）	Pre-reactive agility test（s）	Post-reactive agility test（s）	Pre-right-triple crossover hop test	Pre-left-triple crossover hop test	Post-right-triple crossover hop test（m）	Post-left-triple crossover hop test（m）
1	1	165	58	24	229	5	6	18.68	18.21	9.03	8.67	19.89	18.55	4.29	4.15	4.42	4.22
1	2	163	54	22	225	5	6	18.71	18.3	9.11	8.63	20.23	19.77	4.12	4.04	4.33	4.15
1	3	168	61	23	248	4	6	17.63	17.26	8.71	8.4	19.69	18.38	4.26	4.13	4.4	4.24
1	4	166	59	22	251	4	6.5	17.67	17.21	8.82	8.51	19.73	18.57	4.3	4.17	4.41	4.29
1	5	170	62	23	260	3	8	17.58	16.97	8.53	8.09	19.56	18.59	4.24	4.1	4.48	4.25
1	6	164	55	22	233	4	7	18.74	18.42	8.9	8.55	20.31	19.63	4.1	3.98	4.28	4.17
1	7	166	60	20	252	4	7	18.22	17.39	8.69	8.24	19.62	19.05	4.33	4.15	4.52	4.27
1	8	167	61	24	256	4	6.5	17.79	17.17	8.35	8.01	19.81	19.12	4.32	4.11	4.5	4.26
1	9	164	56	21	225	5	7	19.11	18.64	9.33	8.76	20.86	19.86	4.05	3.96	4.29	4.19
1	10	172	63	23	266	3	7	17.32	16.75	8.28	7.88	19.3	18.58	4.41	4.26	4.59	4.38
1	11	171	64	22	255	4	6	18.22	17.66	8.42	7.9	19.71	18.65	4.32	4.12	4.51	4.25
2	12	172	65	24	271	3	7	17.23	16.39	8.21	7.79	19.28	18.24	4.44	4.28	4.61	4.4
2	13	165	57	22	242	4	7.5	18.49	17.9	8.85	8.28	19.85	18.44	4.32	4.2	4.52	4.38
2	14	167	60	23	261	3	6.5	18.15	17.42	8.36	7.8	19.74	18.52	4.29	4.16	4.45	4.29
2	15	170	61	23	264	3	7	17.35	16.88	8.25	7.81	19.57	18.13	4.34	4.19	4.46	4.31
2	16	163	54	22	226	5	6	18.62	18.14	9.14	8.66	20.2	19.06	4.1	3.97	4.28	4.15
2	17	163	55	21	219	5	7	18.55	18.01	8.73	8.02	19.91	18.43	4.25	4.09	4.49	4.2
2	18	169	61	20	257	4	8	17.62	16.98	8.59	7.86	19.73	18.56	4.27	4.13	4.43	4.31
2	19	164	54	21	254	4	6.5	18.48	18.06	9.02	8.65	20.37	19.13	4.13	4.01	4.3	4.22
2	20	166	56	22	249	4	7	18.19	17.69	8.62	8.21	19.62	18.01	4.27	4.12	4.46	4.26
2	21	165	57	23	229	5	6	19.03	18.44	9.29	8.66	20.54	19.14	4.08	3.96	4.21	4.18
2	22	164	55	24	245	4	7	18.53	17.79	8.81	8.5	19.74	18.34	4.33	4.19	4.54	4.32
